# Supplementary material
Source: PubMed Central journal article supplement (PMC7963590)
Supplement: 17-00417.pdf [file 17-00417.pdf]

**On-line Table 1: Patient demographics, tumor characteristics, and response to therapy<sup>a</sup>**

| Patient No. | Demographics |     | Tumor Characteristics |                         | DCE-MRI Intervals                   |                 | Therapeutic Response |                |                     |                        |                           |
|-------------|--------------|-----|-----------------------|-------------------------|-------------------------------------|-----------------|----------------------|----------------|---------------------|------------------------|---------------------------|
|             | Age (yr)     | Sex | Location              | Localized vs Metastatic | Never Treated vs Previously Treated | Pre-RT Interval | Post-RT Interval     | Radiation Dose | No. of Post-RT MRIs | Time Until Progression | Progression-Free Survival |
| 1           | 48           | M   | Sacrum                | Localized               | Never treated                       | 35 days         | 118 days             | 24 Gy, 1X      | 10                  | NA                     | 1861 days                 |
| 2           | 33           | F   | T12                   | Metastatic              | Previously treated                  | 227 days        | 48 days              | 24 Gy, 1X      | 2                   | 48 days                | 48 days                   |
| 3           | 88           | M   | Clivus                | Localized               | Never treated                       | 19 days         | 57 days              | 27 Gy, 3X      | 6                   | 925 days               | 925 days                  |
| 4           | 57           | F   | C4-C7                 | Localized               | Never treated                       | 51 days         | 67 days              | 24 Gy, 1X      | 10                  | NA                     | 2237 days                 |
| 5           | 48           | F   | Sacrum                | Localized               | Never treated                       | 23 days         | 60 days              | 50 Gy, 25X     | 5                   | NA                     | 413 days                  |
| 6           | 63           | M   | C2                    | Localized               | Never treated                       | 10 days         | 244 days             | 24 Gy, 1X      | 4                   | NA                     | 356 days                  |
| 7           | 57           | M   | C7-T2                 | Metastatic              | Previously treated                  | 284 days        | 416 days             | 72 Gy, 36X     | 1                   | 104 days               | 104 days                  |
| 8           | 78           | M   | C4-C6                 | Localized               | Previously treated                  | 10 days         | 104 days             | 12 Gy, 3X      | 6                   | NA                     | 464 days                  |
| 9           | 41           | M   | Sacrum                | Localized               | Never treated                       | 29 days         | 60 days              | 24 Gy, 1X      | 11                  | NA                     | 1632 days                 |
| 10          | 62           | M   | Sacrum                | Metastatic              | Previously treated                  | 111 days        | 371 days             | 27 Gy, 3X      | 8                   | 610 days               | 610 days                  |
| 11          | 58           | F   | L1-L3                 | Metastatic              | Previously treated                  | 238 days        | 147 days             | 24 Gy, 1X      | 3                   | 43 days                | 43 days                   |

**Note:**—NA indicates not applicable.

<sup>a</sup> Eleven patients were enrolled (7 men, 4 women; 33–88 years of age; mean age, 61 years). Tumors were either focal ( $n = 7$ ) or metastatic ( $n = 4$ ), localizing either to the sacrum ( $n = 4$ ), spine ( $n = 6$ ), or clivus ( $n = 1$ ). Of the tumors, 5 were recurrent. Tumor response to therapy corresponding to radiation dose and duration of local control is also presented.

**On-line Table 2: Comparison of DCE-MRI and conventional MRI metrics<sup>a</sup>**

| Patient No. | DCE-MRI Quantitative and Semiquantitative Metrics |                      |                             |                            |                | Conventional MRI Metrics |                       |                      |                       |
|-------------|---------------------------------------------------|----------------------|-----------------------------|----------------------------|----------------|--------------------------|-----------------------|----------------------|-----------------------|
|             | Tumor Dimensions                                  |                      | Subjective Scores           |                            |                | Tumor Dimensions         |                       | Subjective Scores    |                       |
|             | $V_p$ Mean (% Change)                             | $V_p$ Max (% Change) | $K^{trans}$ Mean (% Change) | $K^{trans}$ Max (% Change) | AUC (% Change) | Reader 1 Pre-RT (mm)     | Reader 1 Post-RT (mm) | Reader 2 Pre-RT (mm) | Reader 2 Post-RT (mm) |
| 1           | -63.49                                            | -56.04               | -45.95                      | -32.88                     | -17.73         | 31.3 × 73.3              | 31.0 × 75.2           | 31 × 72              | 32 × 74               |
| 2           | +39.13                                            | -14.69               | -64.37                      | -55.03                     | -75.97         | 11.1 × 11.4              | 19.7 × 21.6           | 11 × 11              | 20 × 22               |
| 3           | -78.24                                            | -73.29               | -48.66                      | -53.20                     | -26.36         | 20.2 × 27.6              | 18.7 × 27.8           | 19 × 28              | 19 × 28               |
| 4           | -2.18                                             | -60.28               | -20.28                      | +14.57                     | +97.60         | 15.1 × 18.8              | 16.5 × 17.4           | 15 × 19              | 17 × 18               |
| 5           | -55.00                                            | -15.30               | +9.09                       | +218.72                    | -65.23         | 29.3 × 75.7              | 29.4 × 75.9           | 28 × 77              | 27 × 76               |
| 6           | -83.83                                            | -76.69               | -36.57                      | -9.88                      | -31.22         | 13.0 × 20.0              | 9.2 × 12.7            | 12 × 21              | 8 × 11                |
| 7           | +44.43                                            | +78.01               | -30.56                      | -50.99                     | -14.14         | 20.28 × 27.77            | 14.87 × 32.38         | 21 × 28              | 16 × 31               |
| 8           | -34.42                                            | -26.90               | +11.17                      | +117.49                    | -43.14         | 24.0 × 47.2              | 22.1 × 45.7           | 24 × 47              | 23 × 45               |
| 9           | -47.34                                            | -16.86               | -46.97                      | +8.71                      | -10.48         | 32.8 × 65.7              | 33.0 × 66.4           | 34 × 67              | 35 × 56               |
| 10          | +29.68                                            | -13.24               | -13.23                      | -49.72                     | +51.59         | 48.3 × 63.4              | 40.6 × 63.9           | 48 × 60              | 40 × 62               |
| 11          | -93.84                                            | -80.76               | -82.58                      | -73.73                     | -56.32         | 6.6 × 9.0                | 24.5 × 25.6           | 7 × 10               | 25 × 26               |

**Note:**—% Change indicates DCE-MRI quantitative ( $V_p$  max,  $V_p$  mean,  $K^{trans}$  max,  $K^{trans}$  mean) and semiquantitative (AUC) metrics as the percentage change from baseline.

<sup>a</sup> DCE-MRI quantitative ( $V_p$  max,  $V_p$  mean,  $K^{trans}$  max,  $K^{trans}$  mean) and semiquantitative (AUC) metrics are represented as percentage change from baseline. Corresponding tumor dimensions and subjective scores pre- and postirradiation therapy were provided by 2 attending neuroradiologists.
